# Supplementary material
Source: PubMed Central journal article supplement (PMC4613959)

**Title:** Functional selectivity of kappa opioid receptor (KOR) agonists in peripheral sensory neurons.

**Authors:** Raehannah J. Jamshidi, Blaine A. Jacobs, Laura C. Sullivan, Teresa A. Chavera, Rachel M. Saylor, Thomas E. Prisinzano, William P. Clarke, Kelly A. Berg

**Journal Name:** Journal of Pharmacology and Experimental Therapeutics

### **Supplemental Figure Legends**

**Supplemental Figure 1. Time-course and dose response curves for U50488 (A) and Sal-A (B) to inhibit PGE<sub>2</sub>-induced thermal allodynia in the rat hindpaw.** Rats received injections of PGE<sub>2</sub> (0.3 µg) with indicated doses of U50488 (A) or Sal-A (B). Paw withdrawal latencies (PWL) were measured in duplicate every 5 min for 20 min after the last injection. Data are expressed as change from individual baselines and represent mean +/- SEM, n= 4-10.

**Supplemental Figure 2. Time-course and dose response curve for EOM-Sal-B to inhibit PGE<sub>2</sub>-induced thermal allodynia in the rat hindpaw.** Rats received injections of PGE<sub>2</sub> (0.3 µg) with indicated doses of EOM-Sal-B. Paw withdrawal latencies (PWL) were measured in duplicate every 5 min for 20 min after the last injection. Data are expressed as change from individual baselines and represent mean +/- SEM, n= 5-6.

**Title:** Functional selectivity of kappa opioid receptor (KOR) agonists in peripheral sensory neurons.

**Authors:** Raehannah J. Jamshidi, Blaine A. Jacobs, Laura C. Sullivan, Teresa A. Chavera, Rachel M. Saylor, Thomas E. Prisinzano, William P. Clarke, Kelly A. Berg

**Journal Name:** Journal of Pharmacology and Experimental Therapeutics

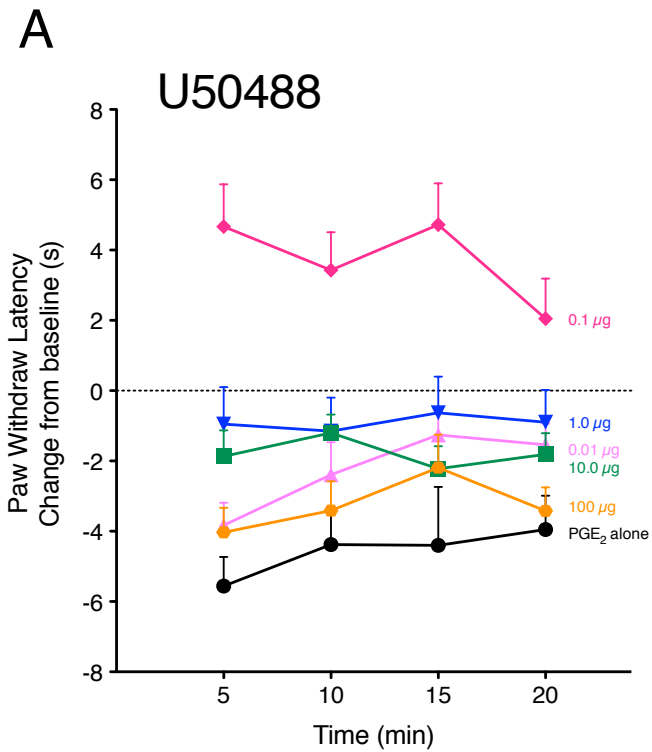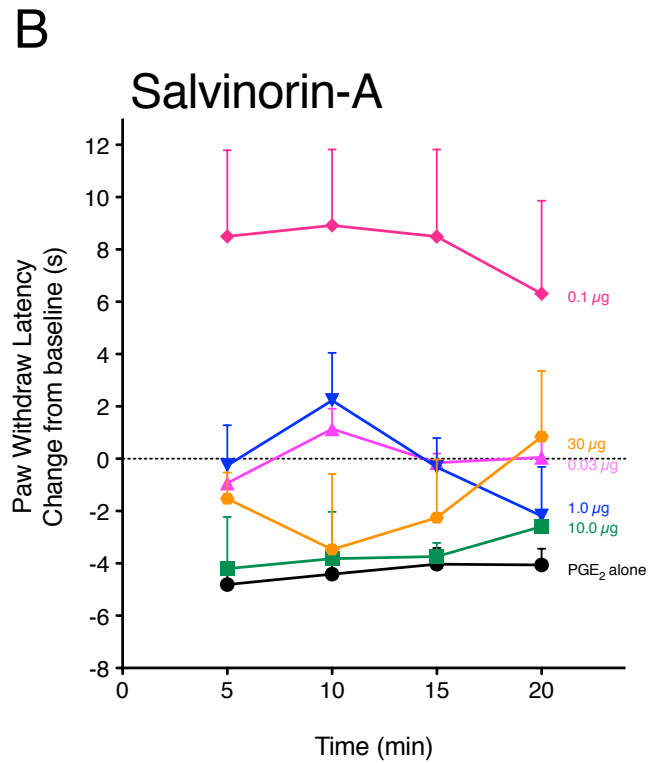

**Title:** Functional selectivity of kappa opioid receptor (KOR) agonists in peripheral sensory neurons.

**Authors:** Raehannah J. Jamshidi, Blaine A. Jacobs, Laura C. Sullivan, Teresa A. Chavera, Rachel M. Saylor, Thomas E. Prisinzano, William P. Clarke, Kelly A. Berg

**Journal Name:** Journal of Pharmacology and Experimental Therapeutics

### EOM-Salvinorin-B

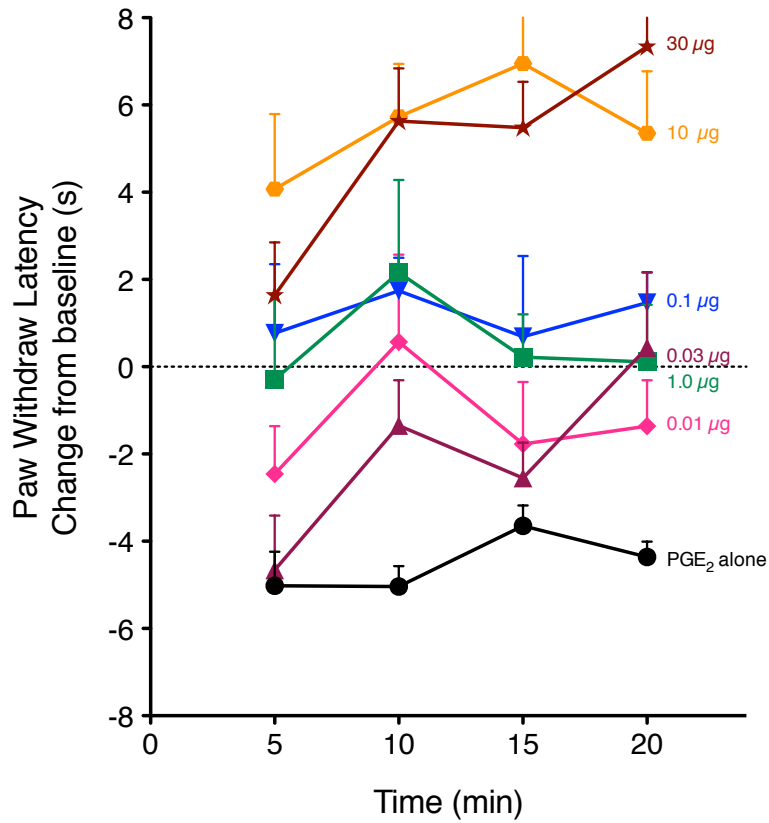

Supplement: supp_115.225896_Supplemental_Data_225896.pdf [file supp_115.225896_Supplemental_Data_225896.pdf]
